# Supplementary material for: The Use and Effectiveness of Selected Alternative Markers for Insulin Sensitivity and Secretion Compared with Gold Standard Markers in Dietary Intervention Studies in Individuals without Diabetes: Results of a Systematic Review
Source: MDPI journal article supplement (doi:10.3390/nu14102036), 2022-05-12
Supplement: s1 [file s1]

**Table S3.** Results of the AIRg trials and DI (surrogate marker).

|                        | AIRg                                                                        |                                                                                      | DI                                                     |                                                                    |
|------------------------|-----------------------------------------------------------------------------|--------------------------------------------------------------------------------------|--------------------------------------------------------|--------------------------------------------------------------------|
|                        | Baseline                                                                    | End of intervention                                                                  | Baseline                                               | End of intervention                                                |
| <b>Osterberg, 2015</b> | VSL#3 probiotic= 481±102 [(mU L <sup>-1</sup> ) 10 min <sup>-1</sup> ] (SE) | VSL#3 probiotic= 523±90[(mU L <sup>-1</sup> ) 10 min <sup>-1</sup> ] (SE), PC= 8.73% | VSL#3 probiotic=2160±293 (x10 <sup>-4</sup> /min) (SE) | VSL#3 probiotic=2718±471 (x10 <sup>-4</sup> /min) (SE), PC= 25.83% |
| <b>Giacco, 2013</b>    | Whole grain=61.4±8.4 (μU/ml) (SE)                                           | Whole grain= 60.0±7.8 (μU/ml) (SE), PC= -2.28%                                       | Whole grain= 140±17(x10 <sup>-4</sup> /min) (SE)       | Whole grain=144±17(x10 <sup>-4</sup> /min) (SE), PC= 2.85%         |
| <b>Kien, 2013</b>      | Men HPA= 227.9±36.7 (min/mU/mL) (SE),                                       | Men HOA= 250.3 ±41.6 (min/mU/mL) (SE), PC= 9.83%                                     | Men HPA=1089.1±139.7 (x10 <sup>-4</sup> /min) (SE)     | Men HOA=1071.1±143.8 (x10 <sup>-4</sup> /min) (SE), PC= -1.65%     |
|                        | Women HPA=330.8±53.4 (min/mU/mL) (SE)                                       | Women HOA= 325.5±68.3(min/mU/mL) (SE), PC= 1.6%                                      | Women HPA=1137±198 (x10 <sup>-4</sup> /min) (SE)**     | Women HOA= 1661±324(x10 <sup>-4</sup> /min) (SE), PC= 46.08%       |
| <b>Douglas, 2006</b>   |                                                                             | MUFA= 1325.8±890.6(uIU/mLx10 minutes) (SD)**, PC=7.38%                               |                                                        | MUFA= 1544.2±858.1 (x10 <sup>-4</sup> /min) (SD), PC= 9.81%        |
|                        | Baseline=1234.7±1036.4 (uIU/mLx10 minutes) (SD)                             | LOW CHO= 1045.6±876.8(uIU/mLx10 minutes) (SD)**, PC= -15.32%                         | Baseline=1406.4±869.8 (x10 <sup>-4</sup> /min) (SD)    | LOW CHO= 1516.4±1987.5 (x10 <sup>-4</sup> /min) (SD), PC= 7.82%    |
|                        |                                                                             | STD= 1096.4±781.3(uIU/mLx10 minutes) (SD), PC= -11.2%                                |                                                        | STD= 1412.3±939.4 (x10 <sup>-4</sup> /min) (SD), PC= 0.42%         |
| <b>Davis, 2009</b>     | N= 1160.4±869.9 μU mL <sup>-1</sup> × 10 min (SD),                          | N= 1222.8±994.2 μU mL <sup>-1</sup> × 10 min (SD), PC= 5.38%                         | N= 1297.1±596.7 (x10 <sup>-4</sup> /min) (SD)          | N= 1723±898.3 (x10 <sup>-4</sup> /min) (SD), PC= 32.84             |
|                        | NS= 1530.0±870.4 μU mL <sup>-1</sup> × 10 min (SD)                          | NS= 1607.0±959.2 μU mL <sup>-1</sup> × 10 min (SD), PC= 5.03%                        | NS= 1832.6±808.8 (x10 <sup>-4</sup> /min) (SD)         | NS= 2002.9±994.3 (x10 <sup>-4</sup> /min) (SD), PC=9.27%           |

\*\*p≤0.05. SD= Standard deviation, SE= Standard error of the mean, PC= Proportional change between baseline and intervention %, AIRg= Acute Insulin Response to glucose, DI= disposition index.
