# Supplementary material for: The Use and Effectiveness of Selected Alternative Markers for Insulin Sensitivity and Secretion Compared with Gold Standard Markers in Dietary Intervention Studies in Individuals without Diabetes: Results of a Systematic Review
Source: MDPI journal article supplement (doi:10.3390/nu14102036), 2022-05-12
Supplement: s1 [file s1]

**Table S2.** Results of the Intravenous Glucose Tolerance Test trials and the surrogate markers.

| Study                     | IVGTT (Si)                                                                                                                        |                                                                                                      | AUC OGTT               |                                   | HOMA-IR                  |                                     | Fasting insulin                                    |                                                                |
|---------------------------|-----------------------------------------------------------------------------------------------------------------------------------|------------------------------------------------------------------------------------------------------|------------------------|-----------------------------------|--------------------------|-------------------------------------|----------------------------------------------------|----------------------------------------------------------------|
|                           | Baseline                                                                                                                          | End of intervention                                                                                  | Baseline               | End of intervention               | Baseline                 | End of intervention                 | Baseline                                           | End of intervention                                            |
| <b>Alemzadeh, 1998</b>    | Diazoxide= 0.77±0.18 (min <sup>-1</sup> uU <sup>-1</sup> mL x 10 <sup>4</sup> ) (SE)                                              | Diazoxide= 1.07±0.21 (min <sup>-1</sup> uU <sup>-1</sup> mL x 10 <sup>4</sup> ) (SE), PC= 38.96%     |                        |                                   |                          |                                     | Diazoxide= 168±14 pmol/l (SE)                      | Diazoxide=108±13 pmol/l (SE)**, PC= -35.71%                    |
| <b>Osterberg, 2015</b>    | VSL#3 probiotic=5.9±1.3 [(mU L <sup>-1</sup> min <sup>-1</sup> )] (SE)                                                            | VSL#3 probiotic=5.5±0.9 [(mU L <sup>-1</sup> min <sup>-1</sup> )] (SE), PC= -6.78%                   |                        |                                   |                          |                                     | VSL#3 probiotic= 6.1±1.5 mIU ml <sup>-1</sup> (SE) | VSL#3 probiotic= 5.9±1.4 mIU ml <sup>-1</sup> (SE), PC= -3.28% |
| <b>Jans, 2012</b>         | High Monounsaturated Fatty Acid (HMUFA)=3.04±0.28 (Mu/L <sup>-1</sup> min <sup>-1</sup> 10 <sup>-4</sup> ) (SE),                  | HMUFA=2.69±0.30 (Mu/L <sup>-1</sup> min <sup>-1</sup> 10 <sup>-4</sup> ) (SE), PC= -11.51%           |                        |                                   | HMUFA=2.26±0.21 (SE),    | HMUFA=2.27±0.30 (SE), PC= 0.44%     |                                                    |                                                                |
|                           | Low Fat High Complexed Carbohydrate (LFHCC)=3.02±0.66 (Mu/L <sup>-1</sup> min <sup>-1</sup> 10 <sup>-4</sup> ) (SE),              | LFHCC=3.21±0.43 (Mu/L <sup>-1</sup> min <sup>-1</sup> 10 <sup>-4</sup> ) (SE), PC= 6.29%             |                        |                                   | LFHCC=2.88±0.57 (SE),    | LFHCC=2.70± 0.70 (SE), PC= -6.25%   |                                                    |                                                                |
|                           | Low Fat High Complexed Carbohydrate n-3 PUFA (LFHCC n-3)=2.71±0.30 (Mu/L <sup>-1</sup> min <sup>-1</sup> 10 <sup>-4</sup> ) (SE), | LFHCCn-3=2.99±0.31 (Mu/L <sup>-1</sup> min <sup>-1</sup> 10 <sup>-4</sup> ) (SE), PC= 10.33%         |                        |                                   | LFHCCn-3=2.20±0.45 (SE), | LFHCCn-3=2.03±0.26 (SE), PC= -7.73% |                                                    |                                                                |
|                           | High Saturated Fatty Acid (HSFA)=3.47±0.73 (Mu/L <sup>-1</sup> min <sup>-1</sup> 10 <sup>-4</sup> ) (SE)                          | HSFA=3.25±0.41 (Mu/L <sup>-1</sup> min <sup>-1</sup> 10 <sup>-4</sup> ) (SE), PC= -6.34%             |                        |                                   | HSFA=2.18±0.27 (SE)      | HSFA=2.40±0.37 (SE), PC= 10.09%     |                                                    |                                                                |
| <b>Ard, 2004 W</b>        | Group A (advice only)=2.2± 1.13 (mg kg <sup>-1</sup> min <sup>-1</sup> ) (SD),                                                    | Group A=2.2± 1.12 (mg kg <sup>-1</sup> min <sup>-1</sup> ) (SD), PC= 0%                              |                        |                                   |                          |                                     | Group A= 16.65±9.05 μU/ml (SD),                    | Group A=18.41±12.55 μU/ml (SD), PC= 10.57%                     |
|                           | Group B (established protocol) = 2.32± 0.65 (mg kg <sup>-1</sup> min <sup>-1</sup> ) (SD),                                        | Group B=2.97±1.74 (mg kg <sup>-1</sup> min <sup>-1</sup> ) (SD), PC= 28.02%                          |                        |                                   |                          |                                     | Group B=14.14±5.23 μU/ml (SD)                      | Group B= 10 ± 3.35 μU/ml (SD)**, PC= -30.56%                   |
|                           | Group C (established protocol + DASH diet)=1.96± 0.94 (mg kg <sup>-1</sup> min <sup>-1</sup> ) (SD)                               | Group C=2.95±1.62 (mg kg <sup>-1</sup> min <sup>-1</sup> ) (SD)**, PC= 50.51%                        |                        |                                   |                          |                                     | Group C=15.65± 7.99 μU/ml (SD)                     | Group C=13.76±8.84 μU/ml (SD), PC= -12.08%                     |
| <b>%Davy, 2002</b>        | Oat=1.8±0.3 (×10 <sup>-4</sup> /min <sup>-1</sup> /μU <sup>-1</sup> /mL <sup>-1</sup> ) (SE)                                      | Oat=1.8±0.3 (×10 <sup>-4</sup> /min <sup>-1</sup> /μU <sup>-1</sup> /mL <sup>-1</sup> ) (SE), PC= 0% |                        |                                   |                          |                                     | Oat= 93.8±15.4 pmol/L (SE)                         | Oat= 88.4±12.5 pmol/L (SE), PC= -5.76%                         |
| <b>Kolehmainen, 2012</b>  | Bilberries (BB)=2.31±1.00 ((mU/L)- 1 x min-1) (SD)                                                                                | BB=2.42±1.32 ((mU/L)-1 x min-1) (SD), PC= 4.76%                                                      | BB=14.5±10.2 mU/l (SD) | BB=14.4±8.1 mU/l (SD), PC= -0.68% |                          |                                     | BB=14.5±10.2 mU/l (SD)                             | BB=14.4±8.1 mU/l (SD), PC= -0.69%                              |
| <b>Larson-Meyer, 2006</b> | Calorie Restriction (CR)=3.3±0.5 (10 <sup>-4</sup> mU 1 <sup>-1</sup> min <sup>-1</sup> ) (SE),                                   | CR=4.2±1.0 (10 <sup>-4</sup> mU 1 <sup>-1</sup> min <sup>-1</sup> ) (SE)**, PC=27.27%                |                        |                                   |                          |                                     | CR= 9.4±1.5μu/ml (SE)                              | CR= 6.6±0.9 μu/ml (SE)**, PC= -29.79%                          |
|                           | Calorie Restriction + Exercise (CREX)=3.4±0.4 (10 <sup>-4</sup> mU 1 <sup>-1</sup> min <sup>-1</sup> ) (SE),                      | CREX=5.3±0.8 (10 <sup>-4</sup> mU 1 <sup>-1</sup> min <sup>-1</sup> ) (SE)**, 55.88%                 |                        |                                   |                          |                                     | CREX= 9.8±1.0 μu/ml (SE)                           | CREX= 7.0±0.7 μu/ml (SE)**, PC= -28.57%                        |
|                           | Low-calorie diet (LCD)=3.1±0.6 (10 <sup>-4</sup> mU 1 <sup>-1</sup> min <sup>-1</sup> ) (SE),                                     | LCD=4.7±0.9 (10 <sup>-4</sup> mU 1 <sup>-1</sup> min <sup>-1</sup> ) (SE)**, PC=51.61%               |                        |                                   |                          |                                     | LCD= 11.0±0.9 μu/ml (SE)                           | LCD= 9.4±1.3 μu/ml (SE)**, PC= -14.55%                         |

|                |                                                                                                                                     |                                                                                                                           |                                |                                           |                                                  |                                                                                                             |
|----------------|-------------------------------------------------------------------------------------------------------------------------------------|---------------------------------------------------------------------------------------------------------------------------|--------------------------------|-------------------------------------------|--------------------------------------------------|-------------------------------------------------------------------------------------------------------------|
| Tierney, 2011  | HMUFA (high-monounsaturated fatty acid )=2.89±0.17 (mul <sup>-1</sup> ) <sup>-1</sup> min <sup>-1</sup> (SE),                       | HMUFA=2.89±0.16 (mul <sup>-1</sup> ) <sup>-1</sup> min <sup>-1</sup> (SE), PC= 0%                                         |                                |                                           | HMUFA= 9.86±0.51 ulU ml <sup>-1</sup> (SE),      | HMUFA= 9.20±0.56 ulU ml <sup>-1</sup> (SE), PC= -6.6%                                                       |
|                | LFHCC (low-fat, high complex carbohydrate)=2.75±0.18 (mul <sup>-1</sup> ) <sup>-1</sup> min <sup>-1</sup> (SE),                     | LFHCC=2.79±0.17 (mul <sup>-1</sup> ) <sup>-1</sup> min <sup>-1</sup> (SE), PC= 1.45%                                      |                                |                                           | LFHCC= 10.31±0.52 ulU ml <sup>-1</sup> (SE),     | LFHCC= 10.22±0.57 ulU ml <sup>-1</sup> (SE), PC= -0.87%                                                     |
|                | LFHCC n-3=2.58±0.19 (mul <sup>-1</sup> ) <sup>-1</sup> min <sup>-1</sup> (SE),                                                      | LFHCC n-3=2.53±0.18 (mul <sup>-1</sup> ) <sup>-1</sup> min <sup>-1</sup> (SE), PC= -1.94%                                 |                                |                                           | LFHCC n-3= 10.22±0.55 ulU ml <sup>-1</sup> (SE), | LFHCC n-3= 9.60±0.60 ulU ml <sup>-1</sup> (SE), PC= -6.06%                                                  |
|                | HSFA(high-saturated fatty acid)=3.09±0.19 (mul <sup>-1</sup> ) <sup>-1</sup> min <sup>-1</sup> (SE)                                 | HSFA=2.89±0.18 (mul <sup>-1</sup> ) <sup>-1</sup> min <sup>-1</sup> (SE), PC= -6.47%                                      |                                |                                           | HSFA= 9.83±0.54 ulU ml <sup>-1</sup> (SE)        | HSFA= 10.05±0.59 ulU ml <sup>-1</sup> (SE), PC= 2.23%                                                       |
| Brady, 2004    | High n-6 group=2.04± 0.37 (μU min <sup>-1</sup> mL <sup>-1</sup> × 10 <sup>-4</sup> ) (SE)                                          | High n-6 group=1.73± 0.26 (μU min <sup>-1</sup> mL <sup>-1</sup> × 10 <sup>-4</sup> ) (SE), PC= -15.2%                    | High n-6 group=2.24± 0.27 (SE) | High n-6 group=2.28± 0.28 (SE), PC= 17.9% |                                                  |                                                                                                             |
| Fava, 2013     | HM/HGI (high monounsaturated fat/high glycaemic index) =3.49±2.85 (μU min <sup>-1</sup> mL <sup>-1</sup> × 10 <sup>-4</sup> ) (SD), | HM/HGI=3.02±1.28 (μU min <sup>-1</sup> mL <sup>-1</sup> × 10 <sup>-4</sup> ) (SD), PC= -13.47%                            |                                |                                           | HM/HGI=59.8±21.1 qmol l <sup>-1</sup> (SD)       | HM/HGI=61.5±25.4 qmol l <sup>-1</sup> (SD), PC=2.84%                                                        |
|                | HM/LGI (high monounsaturated fat/low glycaemic index) =3.78±2.17 (μU min <sup>-1</sup> mL <sup>-1</sup> × 10 <sup>-4</sup> ) (SD),  | HM/LGI=3.13±1.97 (μU min <sup>-1</sup> mL <sup>-1</sup> × 10 <sup>-4</sup> ) (SD), PC= -17.2%                             |                                |                                           | HM/LGI=67.8±25.2 qmol l <sup>-1</sup> (SD)       | HM/LGI=68.1±32.1 qmol l <sup>-1</sup> (SD), PC= 0.44%                                                       |
|                | HC/HGI (high carbohydrate/high glycaemic index)=2.75±1.55 (μU min <sup>-1</sup> mL <sup>-1</sup> × 10 <sup>-4</sup> ) (SD),         | HC/HGI=2.93±1.48 (μU min <sup>-1</sup> mL <sup>-1</sup> × 10 <sup>-4</sup> ) (SD), PC= 6.55%                              |                                |                                           | HC/HGI=79.0±35.2 qmol l <sup>-1</sup> (SD),      | HC/HGI=67.9±29.4 qmol l <sup>-1</sup> (SD)**, PC= 14%                                                       |
|                | HC/LGI (high carbohydrate/low glycaemic index)=2.86±1.1 (μU min <sup>-1</sup> mL <sup>-1</sup> × 10 <sup>-4</sup> ) (SD),           | HC/LGI=3.45±2.12 (μU min <sup>-1</sup> mL <sup>-1</sup> × 10 <sup>-4</sup> ) (SD), PC= 20.63%                             |                                |                                           | HC/LGI=73.3±37.7 qmol l <sup>-1</sup> (SD),      | HC/LGI=70.6±35.4 qmol l <sup>-1</sup> (SD), PC=3.68%                                                        |
|                | HS (high saturated fat)=3.58±1.67 (μU min <sup>-1</sup> mL <sup>-1</sup> × 10 <sup>-4</sup> ) (SD)                                  | HS=3.21±1.38 (μU min <sup>-1</sup> mL <sup>-1</sup> × 10 <sup>-4</sup> ) (SD), PC= -10.34%                                |                                |                                           | HS=77.6±93.8 qmol l <sup>-1</sup> (SD)           | HS=72.8±80.4 qmol l <sup>-1</sup> (SD), PC= -6.18%                                                          |
|                |                                                                                                                                     |                                                                                                                           |                                |                                           |                                                  |                                                                                                             |
| Giacco, 2013   | Whole grain=2.97±0.2(10 <sup>4</sup> min <sup>-1</sup> /(μU/ml)) (SE)                                                               | Whole grain= 3.05±0.19 (10 <sup>4</sup> min <sup>-1</sup> /(μU/ml)) (SE), PC= 2.69%                                       |                                |                                           | Whole grain=93.8±52.8 qmol l <sup>-1</sup> (SD)  | Whole grain= 103.5±55.6 qmol l <sup>-1</sup> (SD), PC= 10.34%                                               |
| Juntunen, 2003 | Run in period=4.6±2 (10 <sup>-4</sup> min <sup>-1</sup> X μU <sup>-1</sup> XmL <sup>-1</sup> ) (SD)                                 | Rye Bread (RB) period=4.1±2.1(10 <sup>-4</sup> min <sup>-1</sup> X μU <sup>-1</sup> XmL <sup>-1</sup> ) (SD), PC= -10.87% |                                |                                           | Beginning of RB period=59.3±28.3 pmol/L (SD),    | End of RB period=52.4±30.3 pmol/L (SD), PC= -11.63%<br>End of WB period= 49.0±20.3 pmol/L (SD), PC= -16.80% |

|                       |                                                                                                                                                                                 |                                                                                                                                                                                                                                                                                                                                                                                                                                                                                                                   |                                                                          |                                                                                                            |                                       |                                                                   |                                                                                  |                                                                                                                                                                                            |
|-----------------------|---------------------------------------------------------------------------------------------------------------------------------------------------------------------------------|-------------------------------------------------------------------------------------------------------------------------------------------------------------------------------------------------------------------------------------------------------------------------------------------------------------------------------------------------------------------------------------------------------------------------------------------------------------------------------------------------------------------|--------------------------------------------------------------------------|------------------------------------------------------------------------------------------------------------|---------------------------------------|-------------------------------------------------------------------|----------------------------------------------------------------------------------|--------------------------------------------------------------------------------------------------------------------------------------------------------------------------------------------|
|                       |                                                                                                                                                                                 | Wheat Bread<br>(WB)period=3.9±1.8 (10 <sup>-4</sup> min <sup>-1</sup> X<br>μU <sup>-1</sup> XmL <sup>-1</sup> ) (SD), PC= -15.22%                                                                                                                                                                                                                                                                                                                                                                                 |                                                                          |                                                                                                            |                                       |                                                                   | Beginning of WB<br>period=58.9± 25.8<br>pmol/L (SD)                              |                                                                                                                                                                                            |
| <b>Kien, 2013</b>     | Men HPA=5.48±0.77 (x10 <sup>-4</sup> mL<br>μU <sup>-1</sup> min <sup>-1</sup> ) (SE),<br>Women HPA=3.96±0.70 (x10 <sup>-4</sup> mL<br>μU <sup>-1</sup> min <sup>-1</sup> ) (SE) | Men HOA=5.31±1.05 (x10 <sup>-4</sup> mL<br>μU <sup>-1</sup> min <sup>-1</sup> ) (SE), PC= -3.1%<br>Women HOA=6.46±1.38<br>(x10 <sup>-4</sup> mL μU <sup>-1</sup> min <sup>-1</sup> ) (SE)**,<br>PC= 63.13%                                                                                                                                                                                                                                                                                                        |                                                                          |                                                                                                            |                                       |                                                                   | Men Baseline=69±4.8<br>pmol/L (SE),<br>Women<br>baseline=73.8±4.1<br>pmol/L (SE) | Men HOA=66.4 ±4.9<br>pmol/L (SE), PC=-3.76%<br>Men HPA=61±6.1 pmol/L<br>(SE), PC= -11.59%<br>Women HPA=91.5±21.8<br>pmol/L (SE), PC= 23.98%<br>Women HOA=65±5 pmol/L<br>(SE)**, PC= 11.92% |
| <b>Douglas, 2006</b>  | Baseline=1.9±1.7 (SD)                                                                                                                                                           | MUFA= 1.9±1.6<br>(x10 <sup>-4</sup> min <sup>-1</sup> /ulU/mL) (SD), PC=<br>0%<br>LOW CHO=2.1±1.9<br>(x10 <sup>-4</sup> min <sup>-1</sup> /ulU/mL) (SD), PC=<br>10.53%<br>STD=1.9±1.7<br>(x10 <sup>-4</sup> min <sup>-1</sup> /ulU/mL) (SD), PC=<br>0%<br>MUFA=3.9±0.6[x<br>10 <sup>-4</sup> min <sup>-1</sup> /(μU/ml)] (SE)**, PC=<br>CHO=3.5±0.4[x<br>10 <sup>-4</sup> min <sup>-1</sup> /(μU/ml)] (SE), PC =<br>11.42%<br>SAT=3.3±0.5[x<br>10 <sup>-4</sup> min <sup>-1</sup> /(μU/ml)] (SE), PC= -<br>15.38% |                                                                          |                                                                                                            |                                       |                                                                   | Baseline=20.6±7.8<br>μIU/mL (SD)                                                 | MUFA=17.8±7.5 μIU/mL<br>(SD), PC= -13.59%<br>LOW CHO=14.3± 8.2<br>μIU/mL (SD)**, PC= -<br>30.58%<br>STD=17.5±7.2 μIU/mL (SD),<br>PC= -15.04%                                               |
| <b>Paniagua, 2007</b> |                                                                                                                                                                                 |                                                                                                                                                                                                                                                                                                                                                                                                                                                                                                                   |                                                                          |                                                                                                            |                                       |                                                                   |                                                                                  | MUFA=60.7±12.4 pmol/l<br>(SE)<br>CHO=75.2±12.3 pmol/l<br>(SE)**, PC= -19.28%<br>SAT=64.1±9.6 pmol/l (SE),<br>PC= -14.76%                                                                   |
| <b>Davis, 2012</b>    | Nutrition=1.4±0.9 (10 <sup>-4</sup> min <sup>-1</sup> μU<br>mL <sup>-1</sup> ) (SD)                                                                                             | Nutrition= 1.6±0.2 (10 <sup>-4</sup> min <sup>-1</sup> μU<br>mL <sup>-1</sup> ) (SD)**, PC= 14.29%                                                                                                                                                                                                                                                                                                                                                                                                                |                                                                          |                                                                                                            |                                       |                                                                   | Nutrition= 19.1±9.5<br>μU mL <sup>-1</sup> (SD)                                  | Nutrition= 16.1±2.0 μU<br>mL <sup>-1</sup> (SD)**, PC= -15.7%                                                                                                                              |
| <b>Davis, 2009</b>    | Nutrition (N)=<br>1.6±0.9(10 <sup>-4</sup> /min/μU/ml) (SD),<br>Nutrition + strength training<br>(NS)= 1.5±0.9(10 <sup>-4</sup> /min/μU/ml)<br>(SD)                             | N=1.8±0.8(10 <sup>-4</sup> /min/μU/ml)<br>(SD), PC= 12.5%<br>NS = 1.5±0.8(10 <sup>-4</sup> /min/μU/ml)<br>(SD), PC= 0%                                                                                                                                                                                                                                                                                                                                                                                            | N= 459.3±319.5<br>nmol/min/l (SD),<br>NS= 405.0±279.1<br>nmol/min/l (SD) | N= 368.3±386.6<br>nmol/min/l (SD), PC= -<br>19.81%<br>NS= 302.6 ±159.8<br>nmol/min/l (SD), PC= -<br>25.28% | N= 6.1±4.2 (SD),<br>NS= 7.1±2.5 (SD), | N= 5.5±3.3 (SD),<br>PC= -9.84%<br>NS= 6.1±3.0 (SD),<br>PC= -14.08 |                                                                                  |                                                                                                                                                                                            |

\*\*p≤0.05, SD= Standard deviation, SE= Standard error of the mean. PC= Proportional change between baseline and intervention %, IVGTT (Si)= Intravenous Glucose Tolerance Test, HOMA-IR=Homeostatic Model Assessment for Insulin Resistance, AUC OGTT= Area Under the Curve-Oral Glucose Tolerance Test.
