# Supplementary material for: The Use and Effectiveness of Selected Alternative Markers for Insulin Sensitivity and Secretion Compared with Gold Standard Markers in Dietary Intervention Studies in Individuals without Diabetes: Results of a Systematic Review
Source: MDPI journal article supplement (doi:10.3390/nu14102036), 2022-05-12
Supplement: s1 [file s1]

**Table S1.** Results of the Euglycaemic-hyperinsulinaemic clamp trials and the surrogate markers.

| Study                  | Euglycaemic-hyperinsulinaemic clamp                                                 |                                                                                                                                                                                       | AUC OGTT                           |                                                | HOMA-IR                    |                                        | Fasting insulin                 |                                                                                       |
|------------------------|-------------------------------------------------------------------------------------|---------------------------------------------------------------------------------------------------------------------------------------------------------------------------------------|------------------------------------|------------------------------------------------|----------------------------|----------------------------------------|---------------------------------|---------------------------------------------------------------------------------------|
|                        | Baseline                                                                            | End of intervention                                                                                                                                                                   | Baseline                           | End of intervention                            | Baseline                   | End of intervention                    | Baseline                        | End of intervention                                                                   |
| <b>Bogdanzki, 2013</b> | L-arginine=3.2± 1.8 mg/kg/min (SE)                                                  | L-arginine=4.3± 2.1 mg/kg/min (SE)**; PC=34.38%                                                                                                                                       |                                    |                                                |                            |                                        | L-arginine=9.2±13.9 µUI/MI (SE) | L-arginine=25.5±12.7 (SE)** PC= -12.67%                                               |
| <b>Chachay, 2014</b>   | Resveratrol=3.5±2.7 mg/kgLBW/min (SD)                                               | mg/kgLBW/min (SD), PC= -8.57%                                                                                                                                                         |                                    |                                                | Resveratrol=2.8±1.8 (SD)   | Resveratrol=3.6±1.9 (SD), PC= 28.57%   |                                 |                                                                                       |
| <b>Derosa, 2012</b>    | n-3 PUFAs group=5.58±0.81 µmol/min/kg (SD)                                          | n-3 PUFAs group=7.47±1.98 µmol/min/kg (SD)**; PC= 33.87%                                                                                                                              |                                    |                                                | n-3 PUFAs= 2.08± 1.09 (SD) | n-3 PUFAs= 1.81±0.92 (SD), PC= -12.98% |                                 |                                                                                       |
| <b>Grimnes, 2011</b>   | Vit D=33.9±15.5 µmol min <sup>-1</sup> kg <sup>-1</sup> (SD)                        | Vit D= 38.5±15.7 µmol min <sup>-1</sup> kg <sup>-1</sup> (SD), PC= 13.57%                                                                                                             |                                    |                                                | Vit D=1.83±0.59 (SD)       | Vit D=2.24±0.64 (SD), PC= 22.4%        |                                 |                                                                                       |
| <b>Hays, 2006</b>      | Men EX+ Diet= 3.02±0.17 mg kg <sup>-1</sup> min <sup>-1</sup> (SEM)                 | Men EX+ Diet= 3.64±0.27 mg kg <sup>-1</sup> min <sup>-1</sup> (SEM)**; PC= 20.53%                                                                                                     | Men EX+ Diet= 12.1±1.1 µU/ml (SEM) | Men EX+ Diet= 15.6±3.8 µU/ml (SEM), PC= 29.92% | Men EX+ Diet= 2.9±0.3 (SE) | Men EX+ Diet= 3.7±0.8 (SE), PC= 27.58% |                                 |                                                                                       |
| <b>Hokayem, 2013</b>   | Grape PP=10.9±1.0 mg kg <sup>-1</sup> min <sup>-1</sup> (SEM)                       | Post 8 weeks PP=11.4±0.7 mg kg <sup>-1</sup> min <sup>-1</sup> (SEM), PC= 4.59%<br>After fructose supplementation PP=11.4 ±1.1 mg kg <sup>-1</sup> min <sup>-1</sup> (SEM), PC= 4.59% |                                    |                                                |                            |                                        | PP=4.4±0.4 mU/L (SE)            | PP: After 8 weeks=4.4±0.3 mU/L (SE), PC= 0<br>After fructose=4.4±0.4 mU/L (SE), PC= 0 |
| <b>Johnston, 2010</b>  | Resistant starch (RS)=5.8±7.2 min kg pmol (SEM)                                     | RS=6.7±8.1 min kg pmol (SEM)** PC= 15.52%                                                                                                                                             |                                    |                                                | RS= 68.5±4.98 (SE)         | RS= 80.2±12.7 (SE), PC= 17.08%         |                                 |                                                                                       |
| <b>McAuley, 2002</b>   | Moderate exercise(M)=4.6±1.3 mg kg <sup>-1</sup> min <sup>-1</sup> (SD),            | M=5.4±1.5 mg kg <sup>-1</sup> min <sup>-1</sup> (SD), PC= 17.39%                                                                                                                      |                                    |                                                |                            |                                        | M=17.5±11.7 mIU/l (SD)          | M=16.5±11.1 mIU/l (SD), PC= -5.71%                                                    |
|                        | Intensive exercise (I)=5.1±1.6 mg kg <sup>-1</sup> min <sup>-1</sup> (SD)           | I= 6.3±2.1 mg kg <sup>-1</sup> min <sup>-1</sup> (SD)**; PC= 23.53%                                                                                                                   |                                    |                                                |                            |                                        | I=17.0±7.9 mIU/l (SD)           | I=12.9±5.4 mIU/l (SD), PC= -24.12%                                                    |
| <b>Sanchez, 1997</b>   | Calcium=2.89±0.77 mg kg <sup>-1</sup> min <sup>-1</sup> (SE)                        | Calcium= 4±0.95 mg kg <sup>-1</sup> min <sup>-1</sup> (SE)**; PC= 38.41%                                                                                                              |                                    |                                                |                            |                                        | Calcium=71.8±5.9 pmol/l (SE)    | Calcium=64.6±6.2 pmol/l (SE)**; PC= -10.03%                                           |
| <b>Tardy, 2009</b>     | Low-Trans Fatty Acids=5.64±2.49 mg kg body wt <sup>-1</sup> min <sup>-1</sup> (SD), | Low-TFA=5.64±2.01 mg kg body wt <sup>-1</sup> min <sup>-1</sup> (SD), PC= 0                                                                                                           |                                    |                                                | Low-TFA=2.25±1.35 (SD),    | Low-TFA=2.36±1.31 (SD), PC= 4.89%      |                                 |                                                                                       |
|                        | Ruminant-TFA=5.57±1.37 mg kg body wt <sup>-1</sup> min <sup>-1</sup> (SD),          | R-TFA=5.71±1.65 mg kg body wt <sup>-1</sup> min <sup>-1</sup> (SD), PC= 2.51%                                                                                                         |                                    |                                                | R-TFA=3.26±3.08 (SD),      | R-TFA=2.79±2.20 (SD), PC= -14.42%      |                                 |                                                                                       |
|                        |                                                                                     | IP-TFA=5.36±2.26 mg kg body wt <sup>-1</sup> min <sup>-1</sup> (SD), PC= 3.28%                                                                                                        |                                    |                                                | IP-TFA=2.95±2.02 (SD)      | IP-TFA=3.09±2.32 (SD), PC= 4.75%       |                                 |                                                                                       |

|                        |                                                                                                                              |                                                                                              |                                                         |                                                    |                        |                                    |                                                   |
|------------------------|------------------------------------------------------------------------------------------------------------------------------|----------------------------------------------------------------------------------------------|---------------------------------------------------------|----------------------------------------------------|------------------------|------------------------------------|---------------------------------------------------|
|                        | Industrial Product Source-TFA=5.19±2.47 mg kg body wt <sup>-1</sup> min <sup>-1</sup> (SD)                                   |                                                                                              |                                                         |                                                    |                        |                                    |                                                   |
|                        |                                                                                                                              |                                                                                              | Low-glycaemic index:                                    | Low-glycaemic index:                               |                        |                                    |                                                   |
|                        | Low-glycaemic index:                                                                                                         | Low-glycaemic index:                                                                         | 50%CHO=                                                 | 50%CHO=                                            | Low-glycaemic index:   | Low-glycaemic index:               |                                                   |
| Lagerpusch, 2013a      | 50%CHO=9.37±2.15 mg/(kg x min) (SD),                                                                                         | 50%CHO=8.49±2.44 mg/(kg x min) (SD), PC= -9.39%                                              | 90.9±41.1                                               | mU/(L x 3h) (SD), PC= -                            | 50%CHO=1.14±0.54 (SD), | 50%CHO=0.98±0.28 (SD), PC= -14.04% |                                                   |
|                        | 65%CHO=8.66±3.36 mg/(kg x min) (SD)                                                                                          | 65%CHO=8.19±1.55 mg/(kg x min) (SD), PC= -5.43%                                              | AUC mU/(L x 3h) (SD), 65%CHO= 128±56.8 mU/(L x 3h) (SD) | 5.28% 65%CHO= 168±151 mU/(L x 3h) (SD), PC= 31.25% | 65%CHO=2.19±1.72 (SD)  | 65%CHO=1.89±1.08 (SD), PC= -13.7%  |                                                   |
| Lagerpusch, 2013b      | Low-Glycaemic index (LGI) group=11.23±2.54(mg/kg FFM per min) (SD)                                                           | LGI group=9.92±2.35 (mg/kg FFM per min) (SD), PC= -11.67%                                    | LGI=90.84±40.98 AUC mmol/l per 3 h(SD)                  | LGI=86.24±46.17 AUC mmol/l per 3 h (SD), PC= 4.74% | LGI=1.14±0.54 (SD)     | LGI=0.98±0.27 (SD), PC= -14.03%    |                                                   |
| Guebre-Egziabher, 2008 | Baseline=9.54±3.34 mg/kg/min (SD)                                                                                            | After 10 weeks of n-3 polyunsaturated fatty acids (PUFA)= 9.96±2.27 mg/kg/min (SD), PC= 4.4% |                                                         |                                                    |                        | Baseline=42.3±14.4 pmol/l (SD)     | After 10 weeks=37.4±10.5 pmol/l (SD), PC= -11.58% |
| Le, 2009               | Isocaloric=6.2 ±0.3 mg kg <sup>-1</sup> min <sup>-1</sup> (SE),                                                              | High Fructose=4.8±0.2 mg kg <sup>-1</sup> min <sup>-1</sup> (SE)**, PC= 22.58%               |                                                         |                                                    |                        | Isocaloric=49±2 pmol/l (SE)        | High Fructose=60±3 pmol/l (SE)**, PC= 22.45%      |
| Muller, 2015           | Basal=8.89±2.8569 mg kg <sup>-1</sup> min <sup>-1</sup> (SD)                                                                 | 14 d of refeeding=8.71±2.182 mg kg <sup>-1</sup> min <sup>-1</sup> (SD), PC= -2.02%          |                                                         |                                                    |                        | Basal=7.94±4.147 mU/L (SD)         | 14d refeeding=8.20±4.355 mU/L (SD), PC= 3.27%     |
| Ryan, 2011             | Low fat-high carbohydrate diet (LF/HCD)=2.2±0.8 mg/kg <sup>-1</sup> /min <sup>-1</sup> (SD)                                  | Mediterranean Diet (MD)=4.2±2.8 mg/kg <sup>-1</sup> /min <sup>-1</sup> (SD)**, PC= 90.90%    |                                                         |                                                    | LF/HCD =4.7±1.6 (SD)   | MD=3±1.4 (SD)**, PC= -36.17%       |                                                   |
| Brøns, 2001            | Taurine= 10.2±4.5 (mg glu/kg FFM/min) (SD)                                                                                   | Placebo=9.7±0.5 (mg glu/kg FFM/min) (SD), PC= 4.9%                                           |                                                         |                                                    | Taurine=1.99±1.15 (SD) | Placebo=1.82±0.99, PC= 8.54%       |                                                   |
| Ryan, 2013             | AEX (aerobic exercise) +CR (calorie restriction): NGT (normal)=69.1±2.9 (μmol kg FFM <sup>-1</sup> min <sup>-1</sup> ) (SE), | AEX+CR: NGT=77.4±2.9 (μmol kg FFM <sup>-1</sup> min <sup>-1</sup> ) (SE), PC= 12.01%         |                                                         |                                                    |                        | AEX+CR: NGT=67±3 pmol/l (SE),      | AEX+CR: NGT=53±3 pmol/l (SE), PC= -20.9%          |
|                        | IGT (impaired glucose tolerant)=56±5.1 (μmol kg FFM <sup>-1</sup> min <sup>-1</sup> ) (SE)                                   | IGT=62.2±4.0 (μmol kg FFM <sup>-1</sup> min <sup>-1</sup> ) (SE), PC= 11.07%                 |                                                         |                                                    |                        | IGT=109±15 pmol/l (SE)             | IGT=85±9 pmol/l (SE), PC= -22.02%                 |

\*\*p≤0.05, SD= Standard deviation, SE= Standard error of the mean. PC= Proportional change between baseline and intervention %, HOMA-IR=Homeostatic Model Assessment for Insulin Resistance, AUC OGTT= Area Under the Curve-Oral Glucose Tolerance Test.
