# Supplementary material for: The Use and Effectiveness of Selected Alternative Markers for Insulin Sensitivity and Secretion Compared with Gold Standard Markers in Dietary Intervention Studies in Individuals without Diabetes: Results of a Systematic Review
Source: MDPI journal article supplement (doi:10.3390/nu14102036), 2022-05-12
Supplement: s1 [file s1]

|       |                    | Risk of bias                                                                                                                                                                                                                            |    |    |    |    |    |    |                                                                       |
|-------|--------------------|-----------------------------------------------------------------------------------------------------------------------------------------------------------------------------------------------------------------------------------------|----|----|----|----|----|----|-----------------------------------------------------------------------|
|       |                    | D1                                                                                                                                                                                                                                      | D2 | D3 | D4 | D5 | D6 | D7 | Overall                                                               |
| Study | Alemzadeh, 1998    | ?                                                                                                                                                                                                                                       | ?  | +  | ?  | +  | +  | +  |                                                                       |
|       | Osterberg, 2015    | ?                                                                                                                                                                                                                                       | ?  | +  | +  | -  | +  | -  |                                                                       |
|       | Jans, 2012         | ?                                                                                                                                                                                                                                       | ?  |    | -  | -  | -  | +  |                                                                       |
|       | Ard, 2004          | ?                                                                                                                                                                                                                                       | ?  |    | -  | +  | +  | -  |                                                                       |
|       | Davy, 2002         | ?                                                                                                                                                                                                                                       | ?  |    | +  | +  | +  | -  |                                                                       |
|       | Kolehmainen, 2012  | -                                                                                                                                                                                                                                       | ?  |    | +  | +  | +  | +  |                                                                       |
|       | Larson-Meyer, 2006 | ?                                                                                                                                                                                                                                       | ?  |    | +  | -  | +  | +  |                                                                       |
|       | Tierney, 2011      | ?                                                                                                                                                                                                                                       | ?  |    | +  | +  | +  | +  |                                                                       |
|       | Brady, 2004        | ?                                                                                                                                                                                                                                       | ?  | +  | +  | +  | +  | -  |                                                                       |
|       | Fava, 2013         | ?                                                                                                                                                                                                                                       | -  | +  | +  | +  | +  | +  |                                                                       |
|       | Giacco, 2013       | +                                                                                                                                                                                                                                       | +  |    | -  | +  | +  | -  |                                                                       |
|       | Juntunen, 2003     | ?                                                                                                                                                                                                                                       | ?  |    | -  | -  | +  | -  |                                                                       |
|       | Kien, 2013         | ?                                                                                                                                                                                                                                       | ?  |    | +  | +  | +  | +  |                                                                       |
|       | Douglas, 2006      |                                                                                                                                                                                                                                         |    |    | +  | +  | +  | +  |                                                                       |
|       | Paniagua, 2007     | ?                                                                                                                                                                                                                                       | -  |    | +  | +  | +  | -  |                                                                       |
|       | Davis, 2012        | +                                                                                                                                                                                                                                       | +  |    | +  | +  | +  | -  |                                                                       |
|       | Davis, 2009        | +                                                                                                                                                                                                                                       | +  |    | +  | +  | +  | -  |                                                                       |
|       |                    | D1: Random sequence generation<br>D2: Allocation concealment<br>D3: Blinding of participants and personnel<br>D4: Blinding of outcome assessment<br>D5: Incomplete outcome data<br>D6: Selective reporting<br>D7: Other sources of bias |    |    |    |    |    |    | Judgement<br>- Unclear<br>+ Low<br>? No information<br>Not applicable |

Figure S2. Risk of Bias Assessment, IVGTT and AIRg
