# Supplementary material for: The Use and Effectiveness of Selected Alternative Markers for Insulin Sensitivity and Secretion Compared with Gold Standard Markers in Dietary Intervention Studies in Individuals without Diabetes: Results of a Systematic Review
Source: MDPI journal article supplement (doi:10.3390/nu14102036), 2022-05-12
Supplement: s1 [file s1]

|       | Risk of bias           |    |    |    |    |    |    |         |
|-------|------------------------|----|----|----|----|----|----|---------|
|       | D1                     | D2 | D3 | D4 | D5 | D6 | D7 | Overall |
| Study | Bogdanzki, 2013        | +  | +  | +  | +  | +  | +  |         |
|       | Chachay, 2014          | +  | +  | +  | +  | +  | +  |         |
|       | Derosa, 2012           | +  | +  | +  | +  | +  | -  |         |
|       | Grimnes, 2011          | +  | +  | +  | +  | -  | -  |         |
|       | Hays, 2006             | +  | +  |    | ?  | -  | -  |         |
|       | Hokayem, 2013          | +  | +  | +  | ?  | +  | -  |         |
|       | Johnston, 2010         | ?  | ?  | +  | +  | +  | -  |         |
|       | McAuley, 2002          | ?  | +  |    | ?  | +  | -  |         |
|       | Sanchez, 1997          | ?  | ?  | +  | ?  | +  | -  |         |
|       | Tardy, 2009            | ?  | -  | +  | +  | +  | +  |         |
|       | Lagerpusch, 2013a      | ?  | ?  |    | +  | +  | +  |         |
|       | Lagerpusch, 2013b      | ?  | ?  |    | ?  | -  | +  |         |
|       | Guebre-Egziabher, 2008 | ?  | ?  |    | -  | -  | +  |         |
|       | Le, 2009               | ?  | ?  |    | +  | +  | -  |         |
|       | Muller, 2015           | ?  | ?  |    | +  | +  | +  |         |
|       | Ryan, 2011             | ?  | ?  |    | -  | +  | +  |         |
|       | Brøns, 2001            | ?  | ?  | +  | +  | +  | +  |         |
|       | Ryan, 2013             | ?  | ?  |    | ?  | +  | +  |         |

D1: Random sequence generation  
D2: Allocation concealment  
D3: Blinding of participants and personnel  
D4: Blinding of outcome assessment  
D5: Incomplete outcome data  
D6: Selective reporting  
D7: Other sources of bias

**Judgement**  
- Unclear  
+ Low  
? No information  
Not applicable

Figure S1. Risk of bias assessment, Euglycaemic hyperinsulinaemic clamp.
